# Supplementary material for: Sedentary behaviours during pregnancy: a systematic review
Source: PubMed Central journal article supplement (PMC5353895; doi:10.1186/s12966-017-0485-z), 2017-03-16
Supplement: 12966_2017_485_MOESM1_ESM.pdf [file 12966_2017_485_MOESM1_ESM.pdf]

| <b>Ovid MEDLINE (R) 1946 to October Week 3 2015</b> |                                                                                            |                |                    |
|-----------------------------------------------------|--------------------------------------------------------------------------------------------|----------------|--------------------|
| <b>#</b>                                            | <b>Searches</b>                                                                            | <b>Results</b> | <b>Search Type</b> |
| 1                                                   | Pregnant women (MeSH)                                                                      | 5528           | Advanced           |
| 2                                                   | Pregnancy (MeSH)                                                                           | 733929         | Advanced           |
| 3                                                   | Prenatal care (MeSH)                                                                       | 21779          | Advanced           |
| 4                                                   | Sedentary lifestyle (MeSH)                                                                 | 4043           | Advanced           |
| 5                                                   | pregnan* OR gestation* OR gravid* OR antenatal OR prenatal (keywords)                      | 235431         | Advanced           |
| 6                                                   | sedentar* OR sitting OR television OR screen-based OR TV OR watching OR viewing (keywords) | 12222          | Advanced           |
| 7                                                   | 1 OR 2 OR 3 OR 5                                                                           | 759044         | Advanced           |
| 8                                                   | 4 OR 6                                                                                     | 14885          | Advanced           |
| 9                                                   | 7 AND 8                                                                                    | <b>235</b>     | Advanced           |

| <b>EMBASE 1980 to 2015 Week 42</b> |                                                                                            |                |                    |
|------------------------------------|--------------------------------------------------------------------------------------------|----------------|--------------------|
| <b>#</b>                           | <b>Searches</b>                                                                            | <b>Results</b> | <b>Search Type</b> |
| 1                                  | Pregnant woman (MeSH)                                                                      | 41562          | Advanced           |
| 2                                  | Pregnancy (MeSH)                                                                           | 549150         | Advanced           |
| 3                                  | Prenatal care (MeSH)                                                                       | 29123          | Advanced           |
| 4                                  | Prenatal period (MeSH)                                                                     | 7605           | Advanced           |
| 5                                  | Sedentary lifestyle MeSH                                                                   | 6776           | Advanced           |
| 6                                  | pregnan* OR gestation* OR gravid* OR antenatal OR prenatal (keywords)                      | 282991         | Advanced           |
| 7                                  | sedentar* OR sitting OR television OR screen-based OR TV OR watching OR viewing (keywords) | 14853          | Advanced           |
| 8                                  | 1 OR 2 OR 3 OR 4 OR 6                                                                      | 667010         | Advanced           |
| 9                                  | 5 OR 7                                                                                     | 20121          | Advanced           |
| 10                                 | 8 AND 9                                                                                    | <b>285</b>     | Advanced           |

| <b>Web of Science 30-10-2015</b> |                                                                                       |                |
|----------------------------------|---------------------------------------------------------------------------------------|----------------|
| <b>#</b>                         | <b>Search</b>                                                                         | <b>Results</b> |
| 1                                | TI= (pregnan* OR gestation* OR gravid* OR antenatal OR prenatal)                      |                |
| 2                                | TI= (sedentar* OR sitting OR television OR screen-based OR TV OR watching OR viewing) |                |
| 3                                | 2 AND 1                                                                               | <b>406</b>     |

| <b>CINAHL 30-10-2015</b> |                                                                                                                                                          |                |
|--------------------------|----------------------------------------------------------------------------------------------------------------------------------------------------------|----------------|
| <b>#</b>                 | <b>Search</b>                                                                                                                                            | <b>Results</b> |
| 1                        | TI (pregnan* OR gestation* OR gravid* OR antenatal OR prenatal) AND TI (sedentar* OR sitting OR television OR screen-based OR TV OR watching OR viewing) | <b>39</b>      |

| <b>SPORTDiscus 22-10-2015</b> |                                                                                                                                                          |                |
|-------------------------------|----------------------------------------------------------------------------------------------------------------------------------------------------------|----------------|
| <b>#</b>                      | <b>Search</b>                                                                                                                                            | <b>Results</b> |
| 1                             | TI (pregnan* OR gestation* OR gravid* OR antenatal OR prenatal) AND TI (sedentar* OR sitting OR television OR screen-based OR TV OR watching OR viewing) | <b>9</b>       |
